# Supplementary material for: Plasma fetuin-A/α2-HS-glycoprotein correlates negatively with inflammatory cytokines, chemokines and activation biomarkers in individuals with type-2 diabetes
Source: Springer Nature journal article supplement (doi:10.1186/s12865-016-0171-y), 2016-09-26
Supplement: MOESM1 [file 10749248]

**A**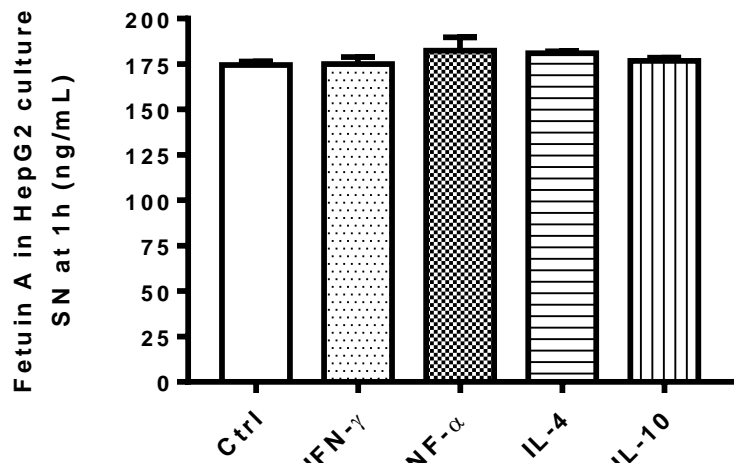**B**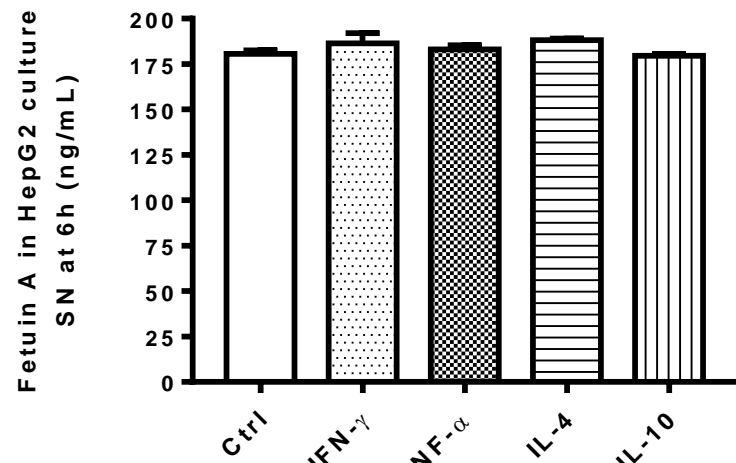**C**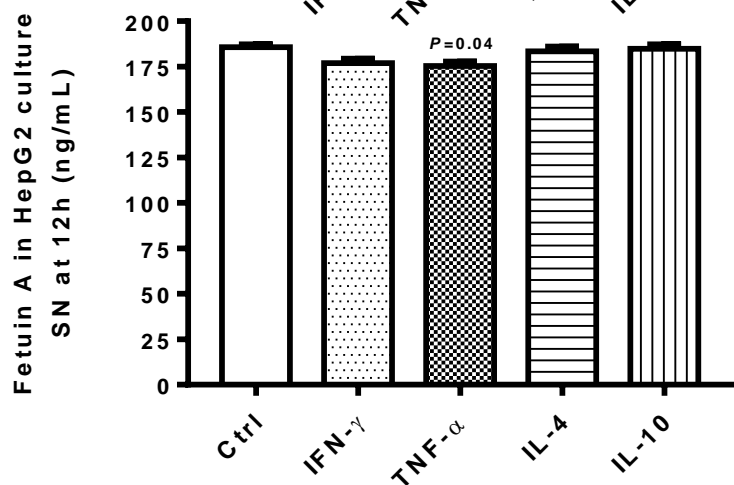**D**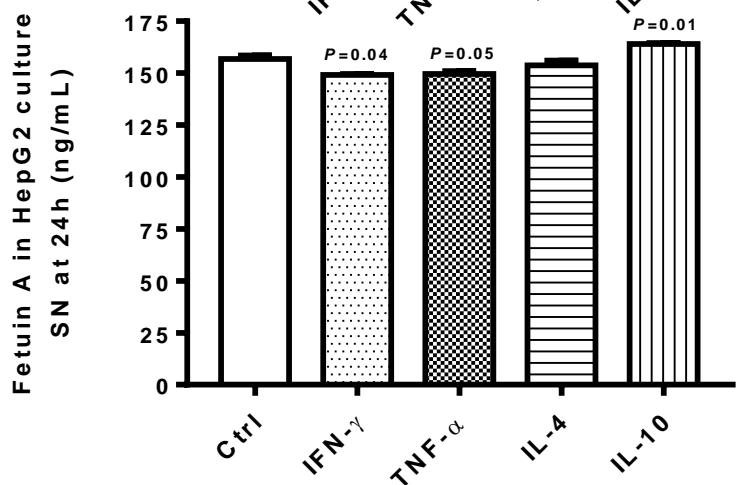**E**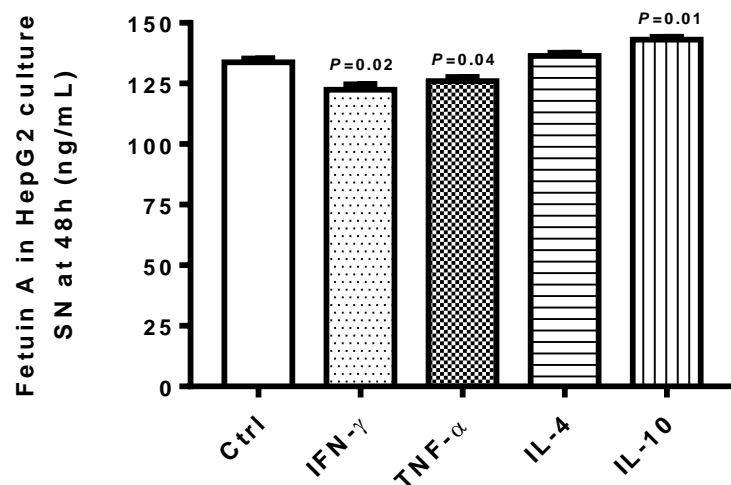**Figure S1**
